# Supplementary material for: Inbreeding and homozygosity in breast cancer survival
Source: PubMed Central journal article supplement (PMC4642301; doi:10.1038/srep16467), 2015-11-12
Supplement: srep16467-s1.pdf [file srep16467-s1.pdf]

## **Inbreeding and homozygosity in breast cancer survival**

Hauke Thomsen,<sup>1\*</sup> Miguel Inacio da Silva Filho,<sup>1</sup> Andrea Woltmann,<sup>1</sup> Robert Johansson,<sup>2</sup> Jorunn E. Eyfjörd,<sup>3</sup> Ute Hamann,<sup>4</sup> Jonas Manjer,<sup>5,6</sup> Kerstin Enquist-Olsson,<sup>7</sup> Roger Henriksson,<sup>2,8</sup> Stefan Herms,<sup>9,10</sup> Per Hoffmann,<sup>9,10</sup> Bowang Chen,<sup>1</sup> Stefanie Huhn,<sup>1</sup> Kari Hemminki,<sup>1,11</sup> Per Lenner,<sup>2</sup> Asta Försti<sup>1,11</sup>

<sup>1</sup> Division of Molecular Genetic Epidemiology, German Cancer Research Center (DKFZ), Heidelberg, Germany

<sup>2</sup> Department of Radiation Sciences & Oncology, Umeå University, Umeå, Sweden

<sup>3</sup> Cancer Research Laboratory, Faculty of Medicine, University of Iceland, Reykjavik, Iceland

<sup>4</sup> Molecular Genetics of Breast Cancer, German Cancer Research Center (DKFZ), Heidelberg, Germany

<sup>5</sup> The Malmö Diet and Cancer Study, Lund University, Malmö, Sweden

<sup>6</sup> Department of Plastic Surgery, Skåne University Hospital, Malmö, Lund University, Malmö, Sweden

<sup>7</sup> Department of Public Health and Clinical Medicine/Nutritional Research, Umeå University, Umeå, Sweden

<sup>8</sup> Cancer Center Stockholm Gotland, Stockholm, Sweden

<sup>9</sup> Institute of Human Genetics, Department of Genomics, University of Bonn, Bonn, Germany

<sup>10</sup> Division of Medical Genetics and Department of Biomedicine, University of Basel, Basel, Switzerland

<sup>11</sup> Center for Primary Health Care Research, Clinical Research Center, Lund University, Malmö, 20502, Sweden

\* Corresponding author: Dr. Hauke Thomsen

German Cancer Research Center (DKFZ)  
Molecular Genetic Epidemiology C050  
Im Neuenheimer Feld 580  
DE-69120 Heidelberg  
Tel.: +49-6221-42-1792  
E-Mail: [h.thomsen@dkfz-heidelberg.de](mailto:h.thomsen@dkfz-heidelberg.de)

Running title: Homozygosity in breast cancer survival

The authors declare no conflict of interest.

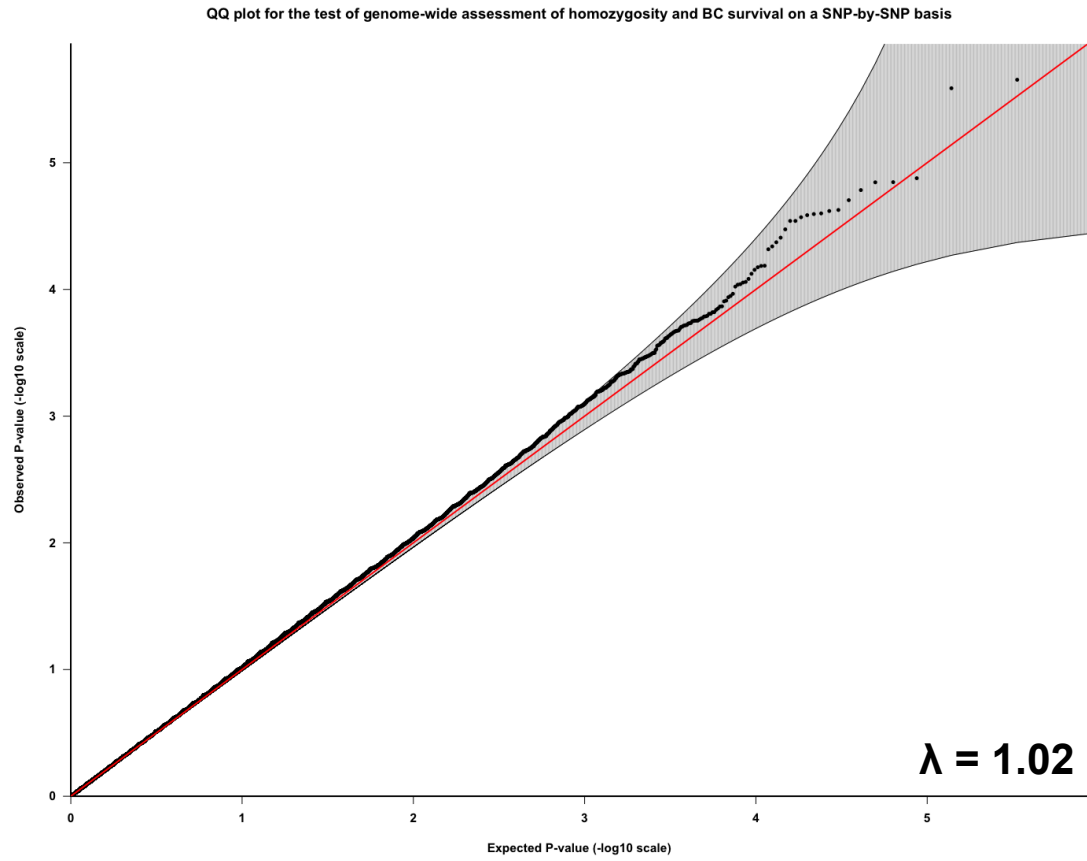

**Supplemental Figure 1: QQ plot for the test of genome-wide assessment of homozygosity and BC survival on a SNP-by-SNP basis with a lambda ( $\lambda$ ) = 1.02**
